# Supplementary material for: Structure and dynamics of an α-fucosidase reveal a mechanism for highly efficient IgG transfucosylation
Source: PubMed Central journal article supplement (PMC7718225; doi:10.1038/s41467-020-20044-z), 2020-12-04
Supplement: 41467_2020_20044_MOESM1_ESM.pdf [file 41467_2020_20044_MOESM1_ESM.pdf]

**Structure and dynamics of an  $\alpha$ -fucosidase reveal a mechanism for highly efficient IgG transfucosylation**

**Erik H. Klontz<sup>1,2,3</sup>, Chao Li<sup>4</sup>, Kyle Kihn<sup>5</sup>, James K. Fields<sup>1,2,3</sup>, Dorothy Beckett<sup>4</sup>, Greg A. Snyder<sup>1</sup>, Patrick L. Wintrode<sup>5</sup>, Daniel Deredge<sup>5</sup>, Lai-Xi Wang<sup>4</sup>, Eric J. Sundberg<sup>1,2,6,7\*</sup>**

<sup>1</sup>Institute of Human Virology, <sup>2</sup>Department of Microbiology & Immunology, <sup>3</sup>Program in Molecular Microbiology & Immunology, University of Maryland School of Medicine, Baltimore, MD 21201 USA

<sup>4</sup>Department of Chemistry and Biochemistry, University of Maryland, College Park, MD 20742, USA

<sup>5</sup>Department of Pharmaceutical Sciences, University of Maryland School of Pharmacy, MD 21201 USA

<sup>6</sup>Department of Medicine, University of Maryland School of Medicine, Baltimore, MD 21201, USA

<sup>7</sup>Present address: Department of Biochemistry, Emory University School of Medicine, Atlanta, GA 30322, USA

Supplemental Figures

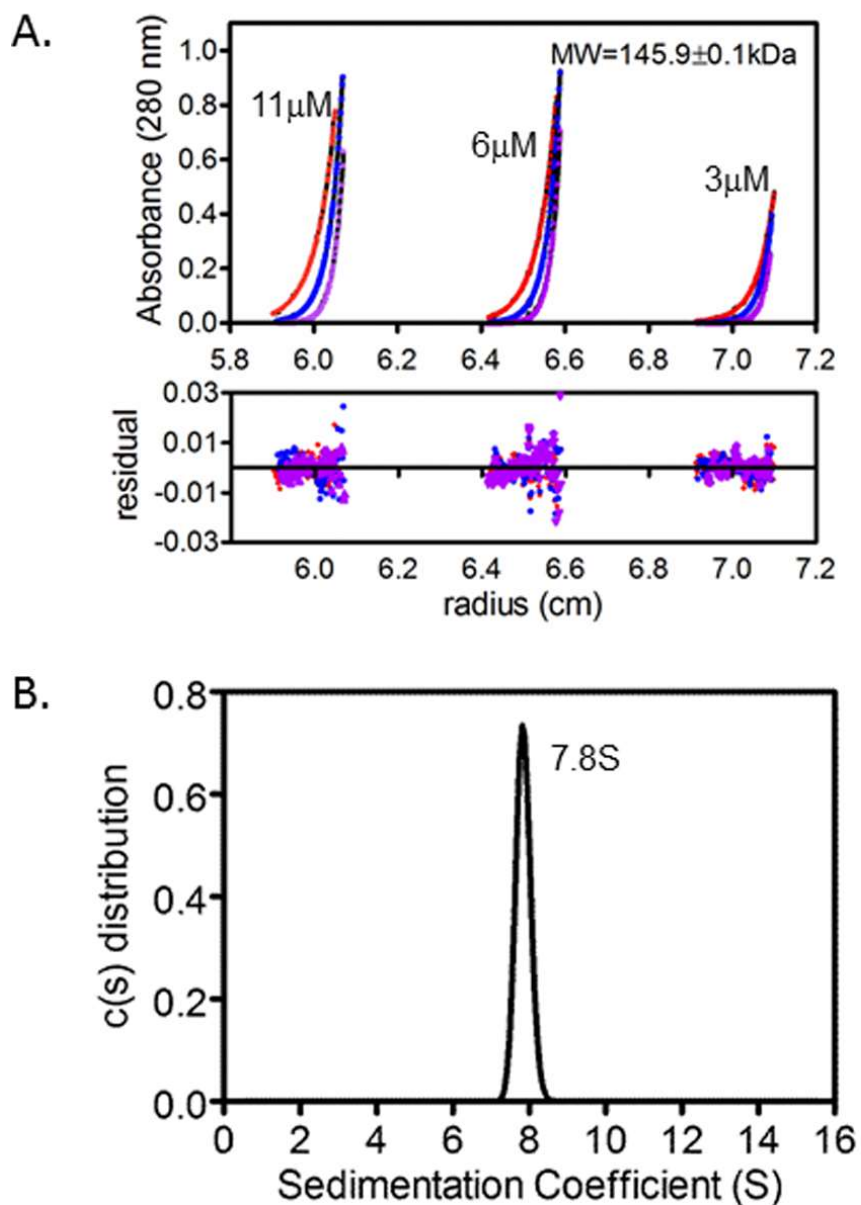

**Supplementary Figure 1:** Sedimentation analysis indicates that AIFC is a tetramer in solution. (A) Global analysis of sedimentation equilibrium data obtained at three loading concentrations and centrifuged at three rotor speeds indicates that the protein is well-described as a single species with an average molecular weight that is within 7% of the value expected for a tetramer (157 kDa). (B) Sedimentation velocity data analyzed using Sedfit yields a single species of 7.8S with a molecular weight of 144kDa (assuming a frictional ratio of 1.27).

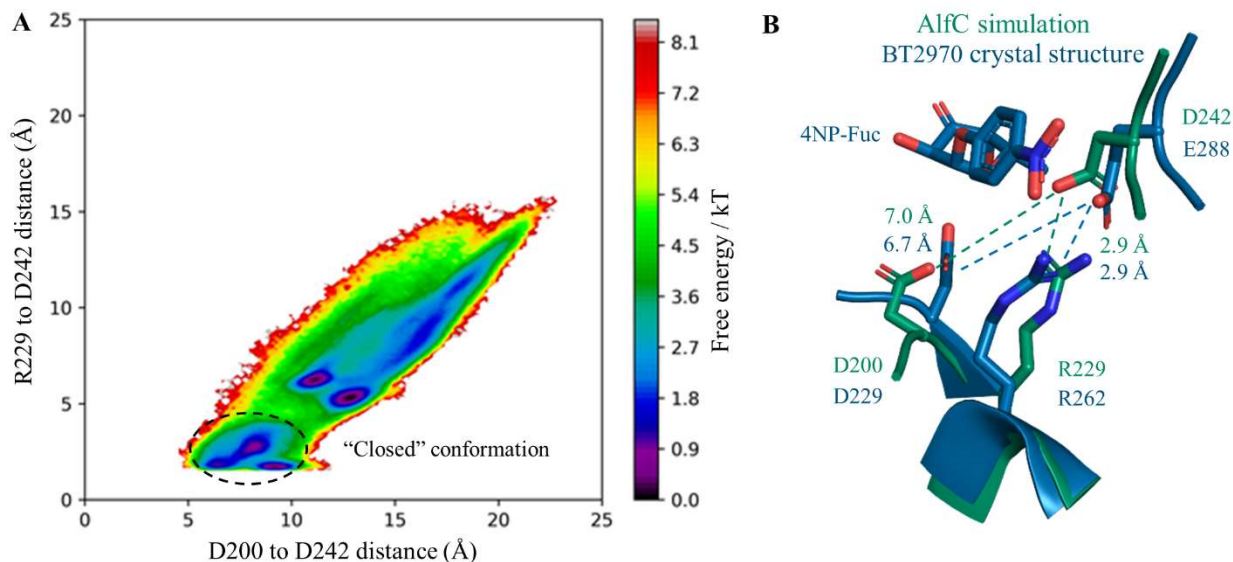

**Supplementary Figure 2.** AlfC<sub>WT</sub> simulation conformations of D242. **(A)** Wild-type AlfC active site free energy surface with respect to the distance between R229 and D242 and the distance between the nucleophile D200 to D242. Pairwise distances were measured from and/or to O<sub>δ</sub> atoms (D200 and D242) and N<sub>η</sub> (R229). Pairwise residue distance measurements returned four distances per monomer per frame. With 4 monomers and 52000 frames, a total of 840,000 distances were generated for each residue pairwise distance. Two-dimensional histograms were generated and free energy was calculated using  $-kT \ln P_{Dij}$ , where  $P_{Dij}$  is the probability for the measured distances to be within the bin  $ij$ ,  $k$  is Boltzmann’s constant, and  $T$  is temperature (298 K). The bin size is 0.083 Å for both coordinates. **(B)** The “closed” conformation of AlfC D242 from simulations closely resembles the catalytically active state of BT2970, including the distance and orientation of catalytic residues, as well a salt-bridge with an active-site arginine.

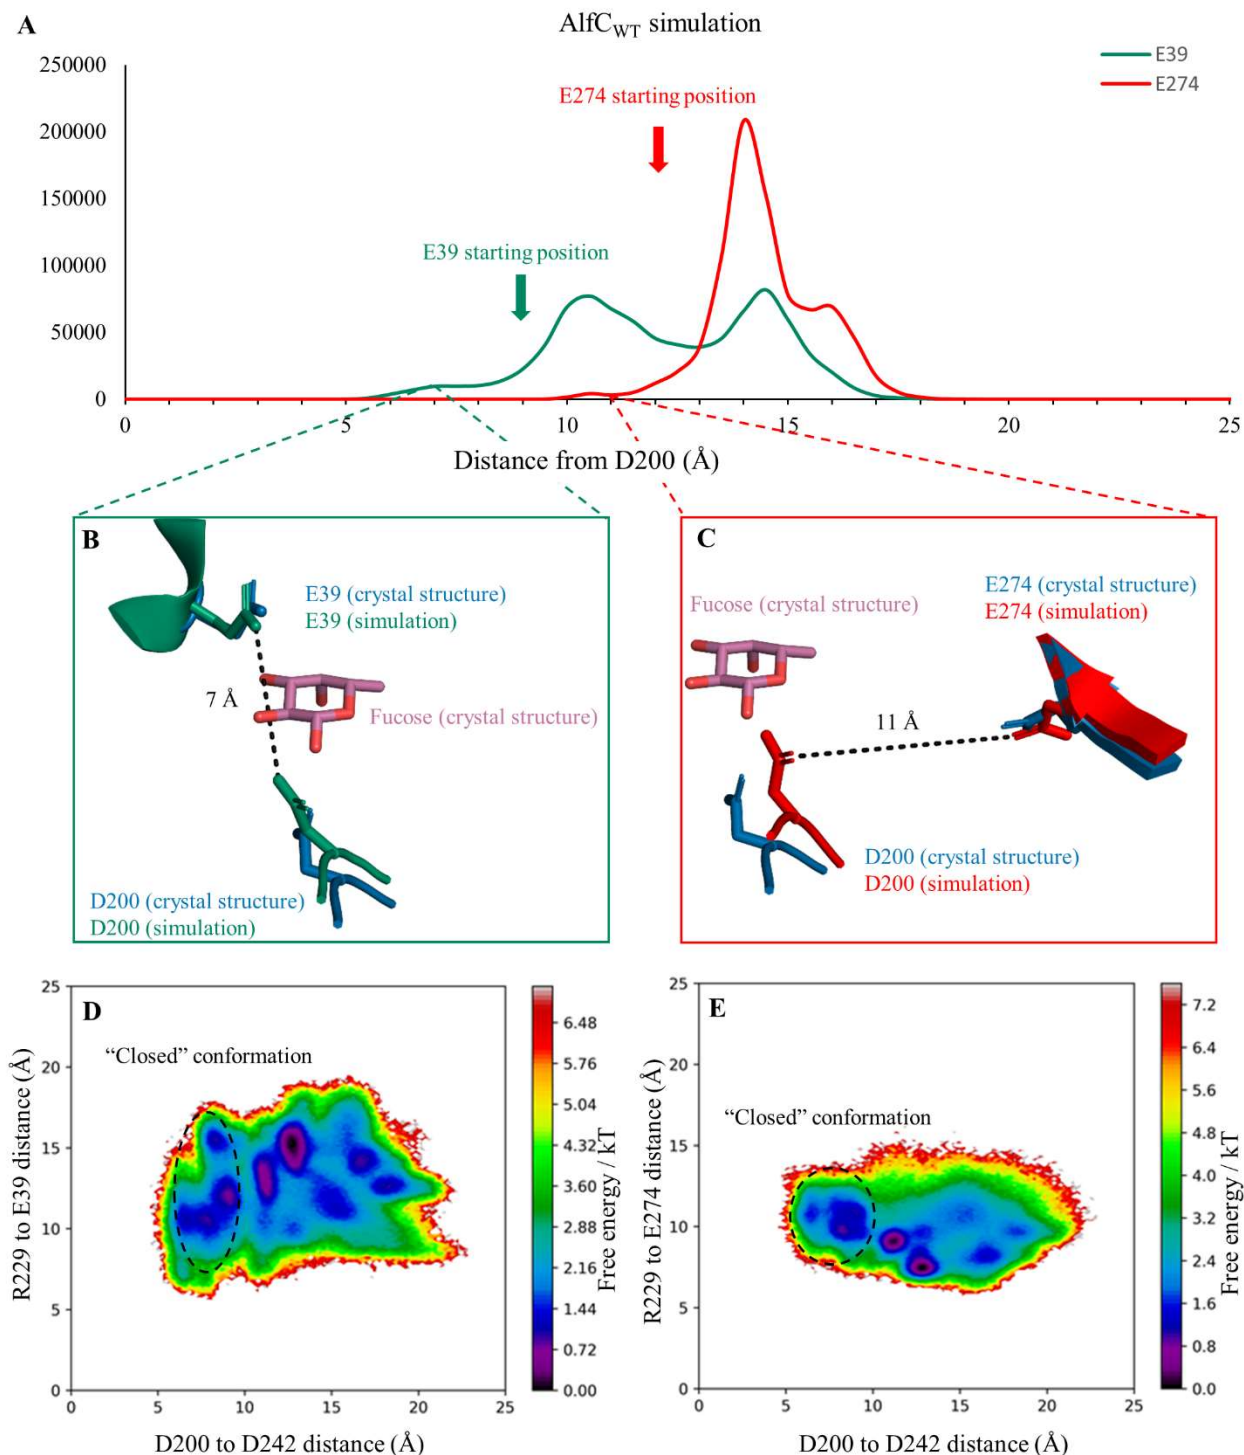

**Supplementary Figure 3.** AlfC<sub>WT</sub> simulation conformations of E39 and E274. **(A)** Residues E39 and E274 tended to drift away from D200 during simulations. **(B-C)** In rare frames where E39 and E274 were closer to D200 than their starting position, their orientations were similar to those seen in crystal structures and non-productive for catalysis. **(D-E)** Wild-type AlfC active site free energy surface with respect to the distance between R229 and E39 or E274 and the distance between the nucleophile D200 to D242. Pairwise distances were measured from and/or to O<sub>δ</sub> atoms (D200 and D242), O<sub>γ</sub> (E39 and E274) and N<sub>η</sub> (R229). Pairwise residue measurements returned four distances per monomer per frame. With 4 monomers and 52000 frames, a total of 840,000 distances were generated for each residue pairwise distance. Two-dimensional histograms were generated and free energy was calculated using  $-kT \ln P_{Dij}$ , where  $P_{Dij}$  is the probability for the measured distances to be within the bin  $ij$ ,  $k$  is the Boltzmann constant, and  $T$  is temperature (298 K). The bin size is 0.083 Å for both coordinates.

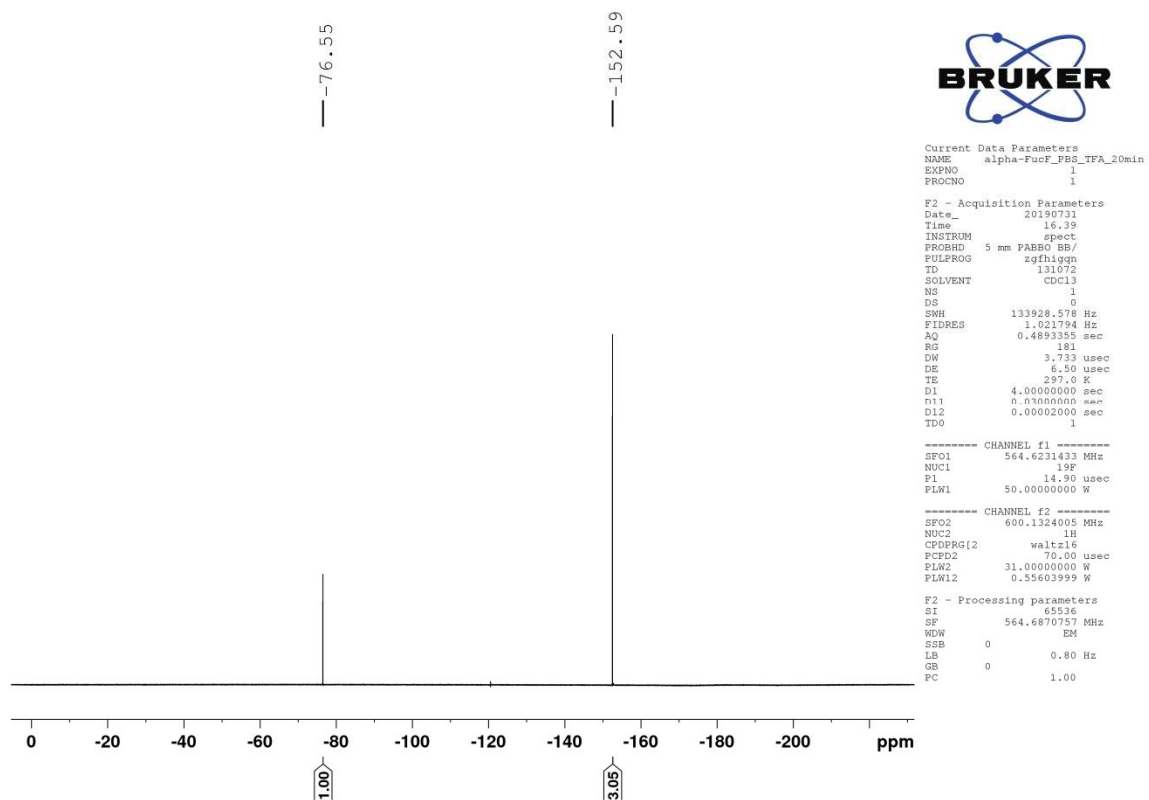

**Supplementary Figure 4.**  $^{19}\text{F}$  NMR spectrum of an azide rescue reaction containing  $\alpha$ -fucosyl fluoride, Alfc E274A and  $\text{NaN}_3$  in a PBS buffer.

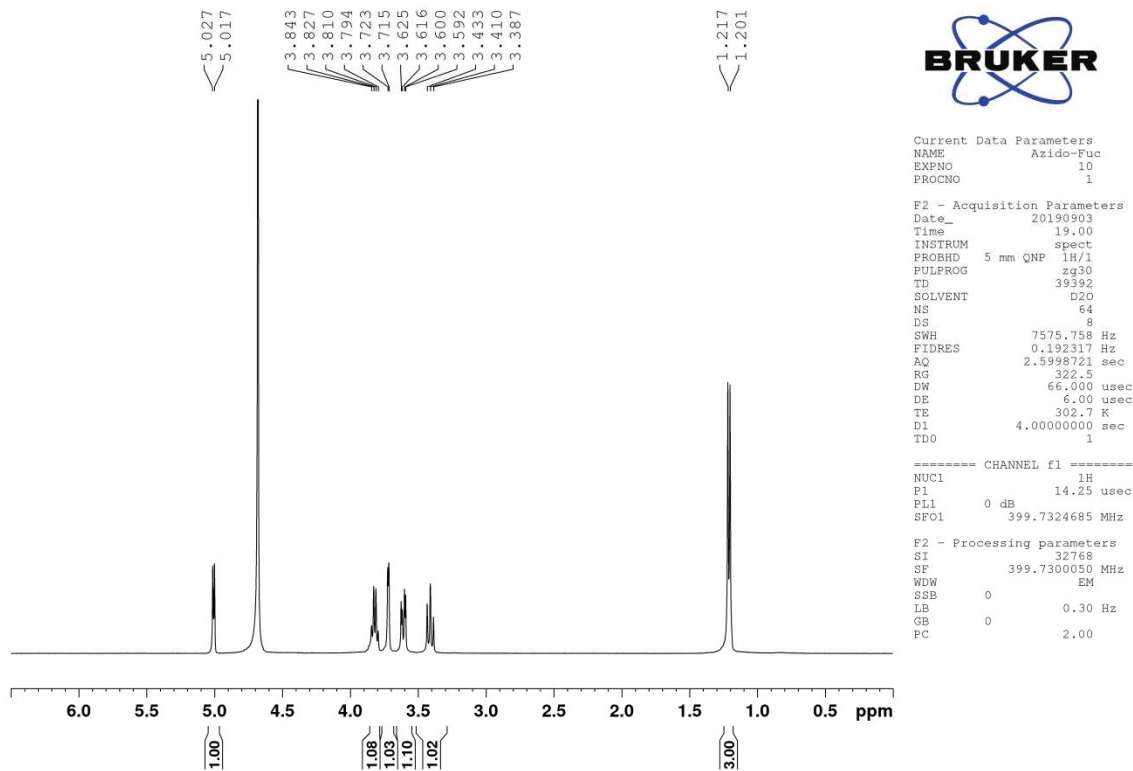

Supplementary Figure 5. <sup>1</sup>H NMR spectrum of α-fucosyl azide.

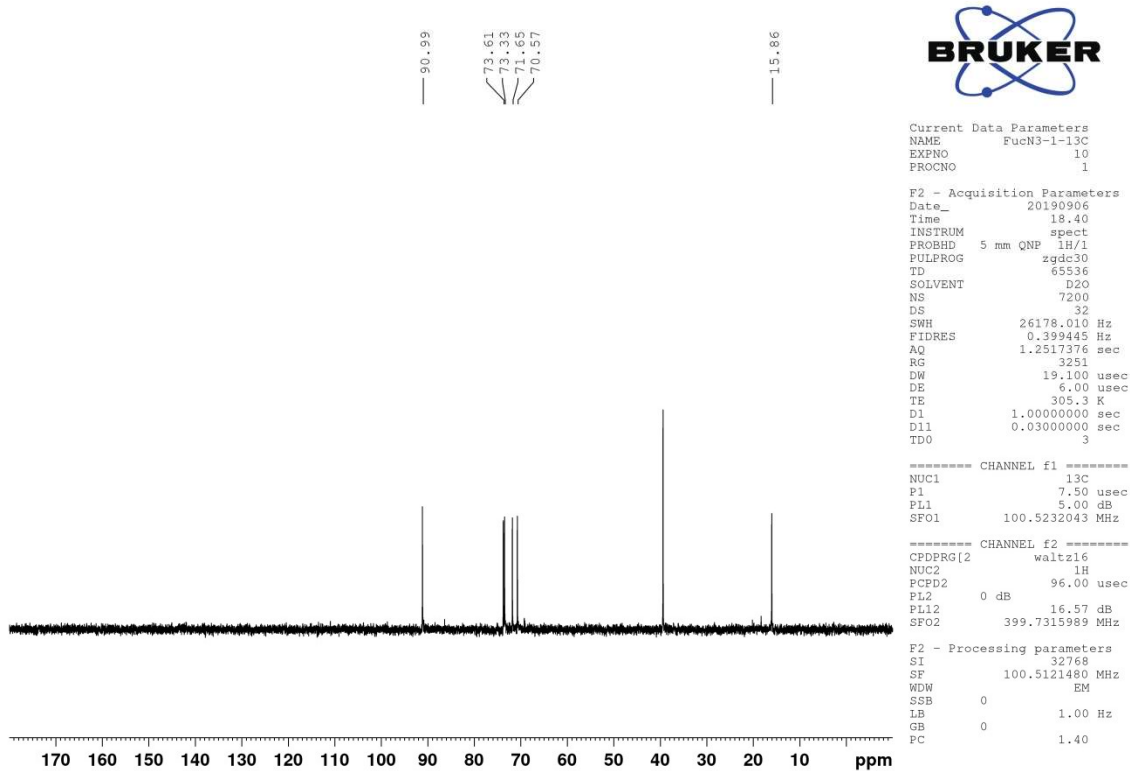

Supplementary Figure 6. <sup>13</sup>C NMR spectrum of α-fucosyl azide.

(A)

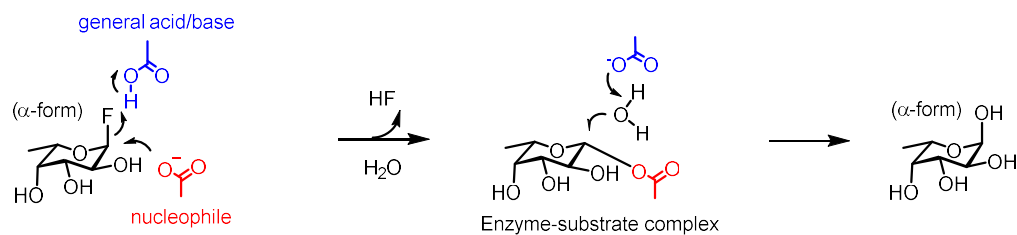

(B)

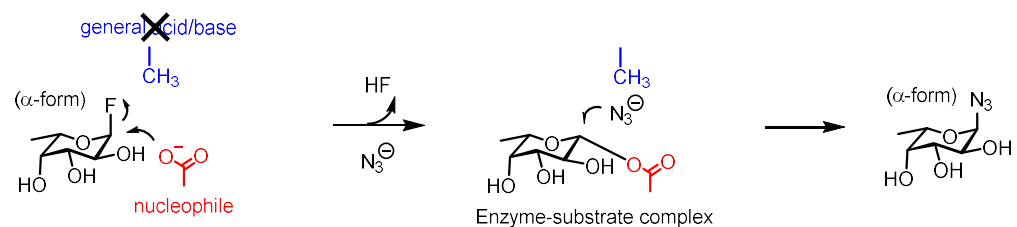

**Supplementary Figure 7.** Catalytic mechanisms of  $\alpha$ -fucosyl fluoride using Alfc<sub>WT</sub> and Alfc<sub>E274A</sub>. (A) Hydrolysis by Alfc  $\alpha$ -fucosidase via double displacement. (B) Azide rescue of Alfc  $\alpha$ -fucosyl fluoride mutant E274A.



A

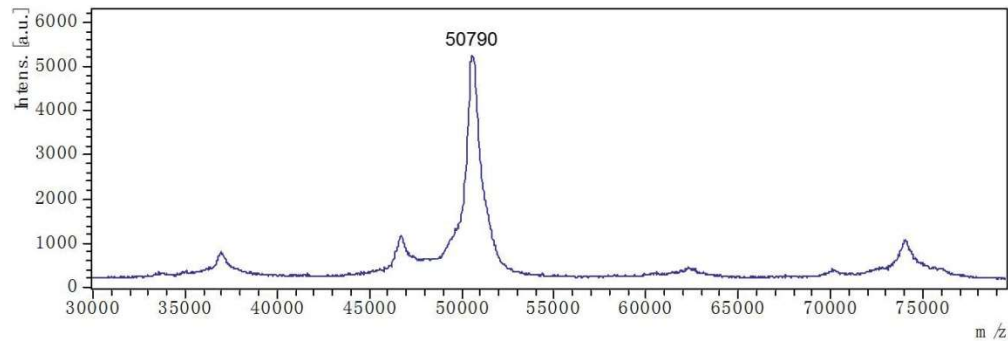

B

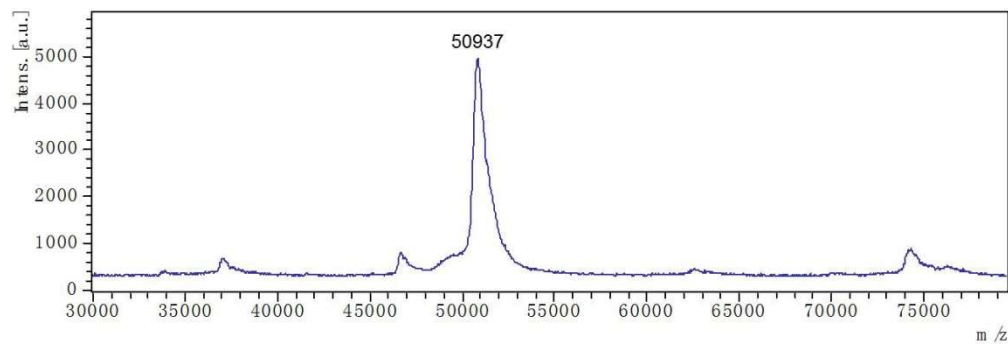

C

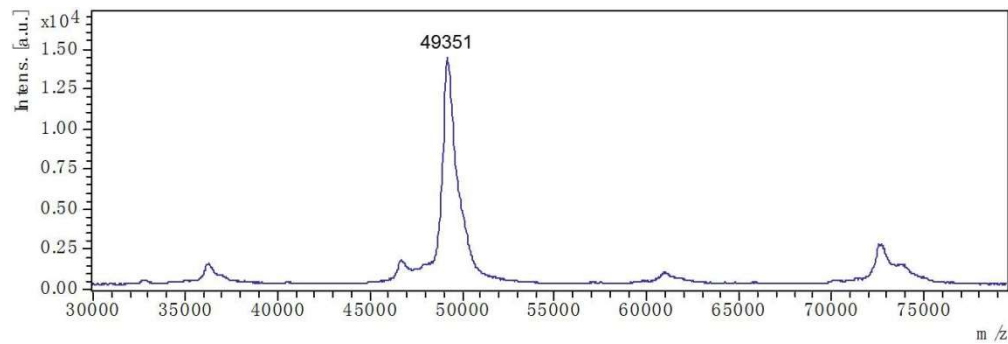

**Supplementary Figure 8.** MALDI-TOF-MS analysis of the heavy chain of Herceptin glycovariants with DTT treatment. (A) S0G2-Herceptin. (B) S0G2F-Herceptin generated by the AlfC<sub>N243A</sub> mutant. (C) GlcNAc-Herceptin generated by EndoS2 and AlfC wild-type enzymes. The MALDI-TOF-MS analysis showed almost complete conversion for the enzymatic reactions; yields indicated isolated yields after a single protein A affinity chromatographic purification and quantification by nanodrop analysis.

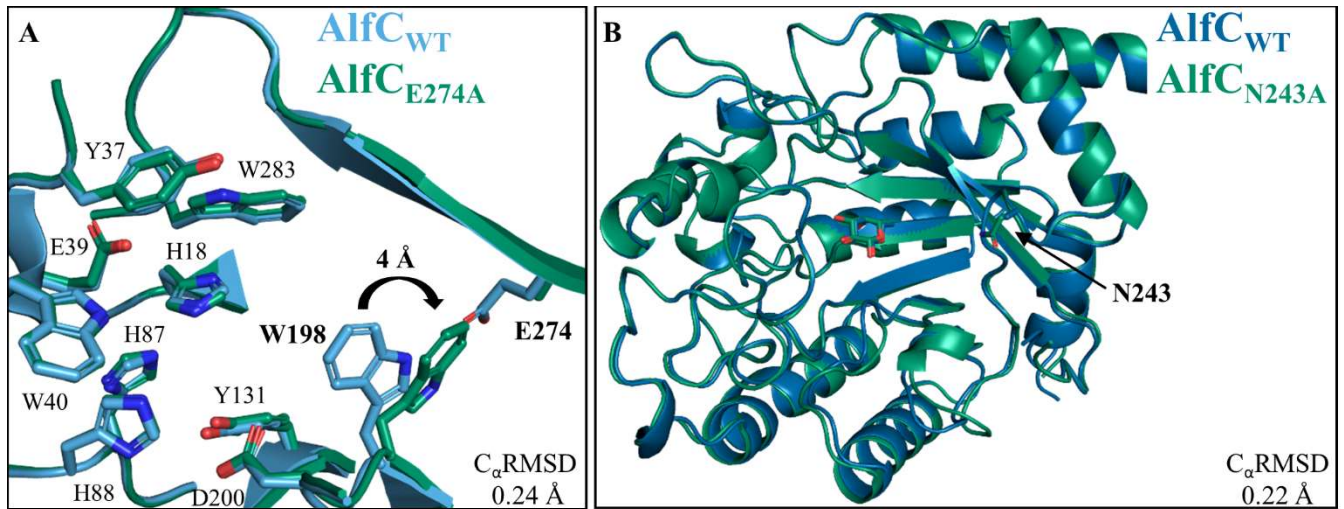

**Supplementary Figure 9.** Structure of (A) AlfC<sub>E274A</sub> (green) and (B) AlfC<sub>N243A</sub> (green) compared to AlfC<sub>WT</sub> (blue).

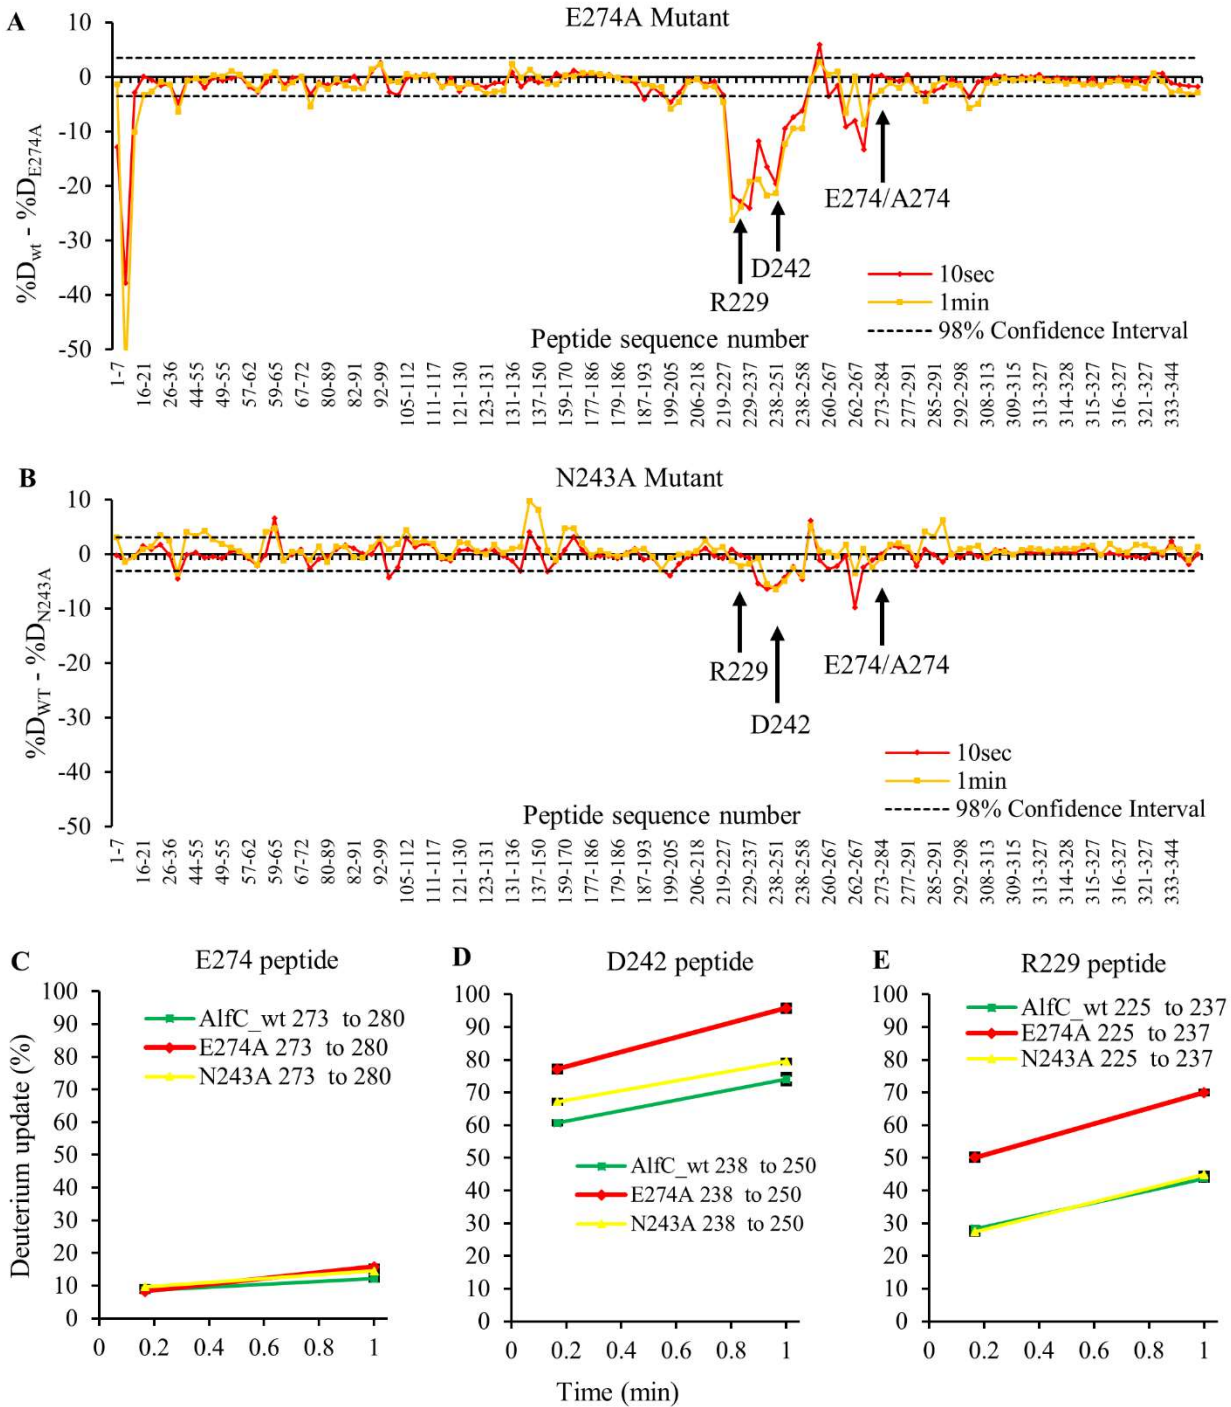

**Supplementary Figure 10.** HDX-MS of wild type and mutant AlfC E27A and N243A display the solution structure and dynamics of critical motifs of AlfC. **(A-B)** Deuterium uptake difference plots were plotted for wild-type AlfC vs E274A **(A)** and wild type AlfC vs N243A **(B)**. Individual peptides were plotted on the x-axis, going from N- to C-terminus based on the starting residue of each peptides. The difference in percent deuteration between the wild-type and mutant is plotted for each peptide following 10 sec (red) and 1 min (yellow) of incubation in deuterated buffer. 98% confidence interval is displayed as dashed lines. Statistically significant differences are mapped on Figure 6C-D. **(C-E)** Percent deuterium uptake traces for representative peptides from critical motifs including residue 274 **(C)**, residues 242 and 243 **(D)**, and residue 229 **(E)** in the context of wild-type AlfC (green), E274A mutant (red) and N243A mutant (yellow). Percent standard deviation are shown in black error bars.

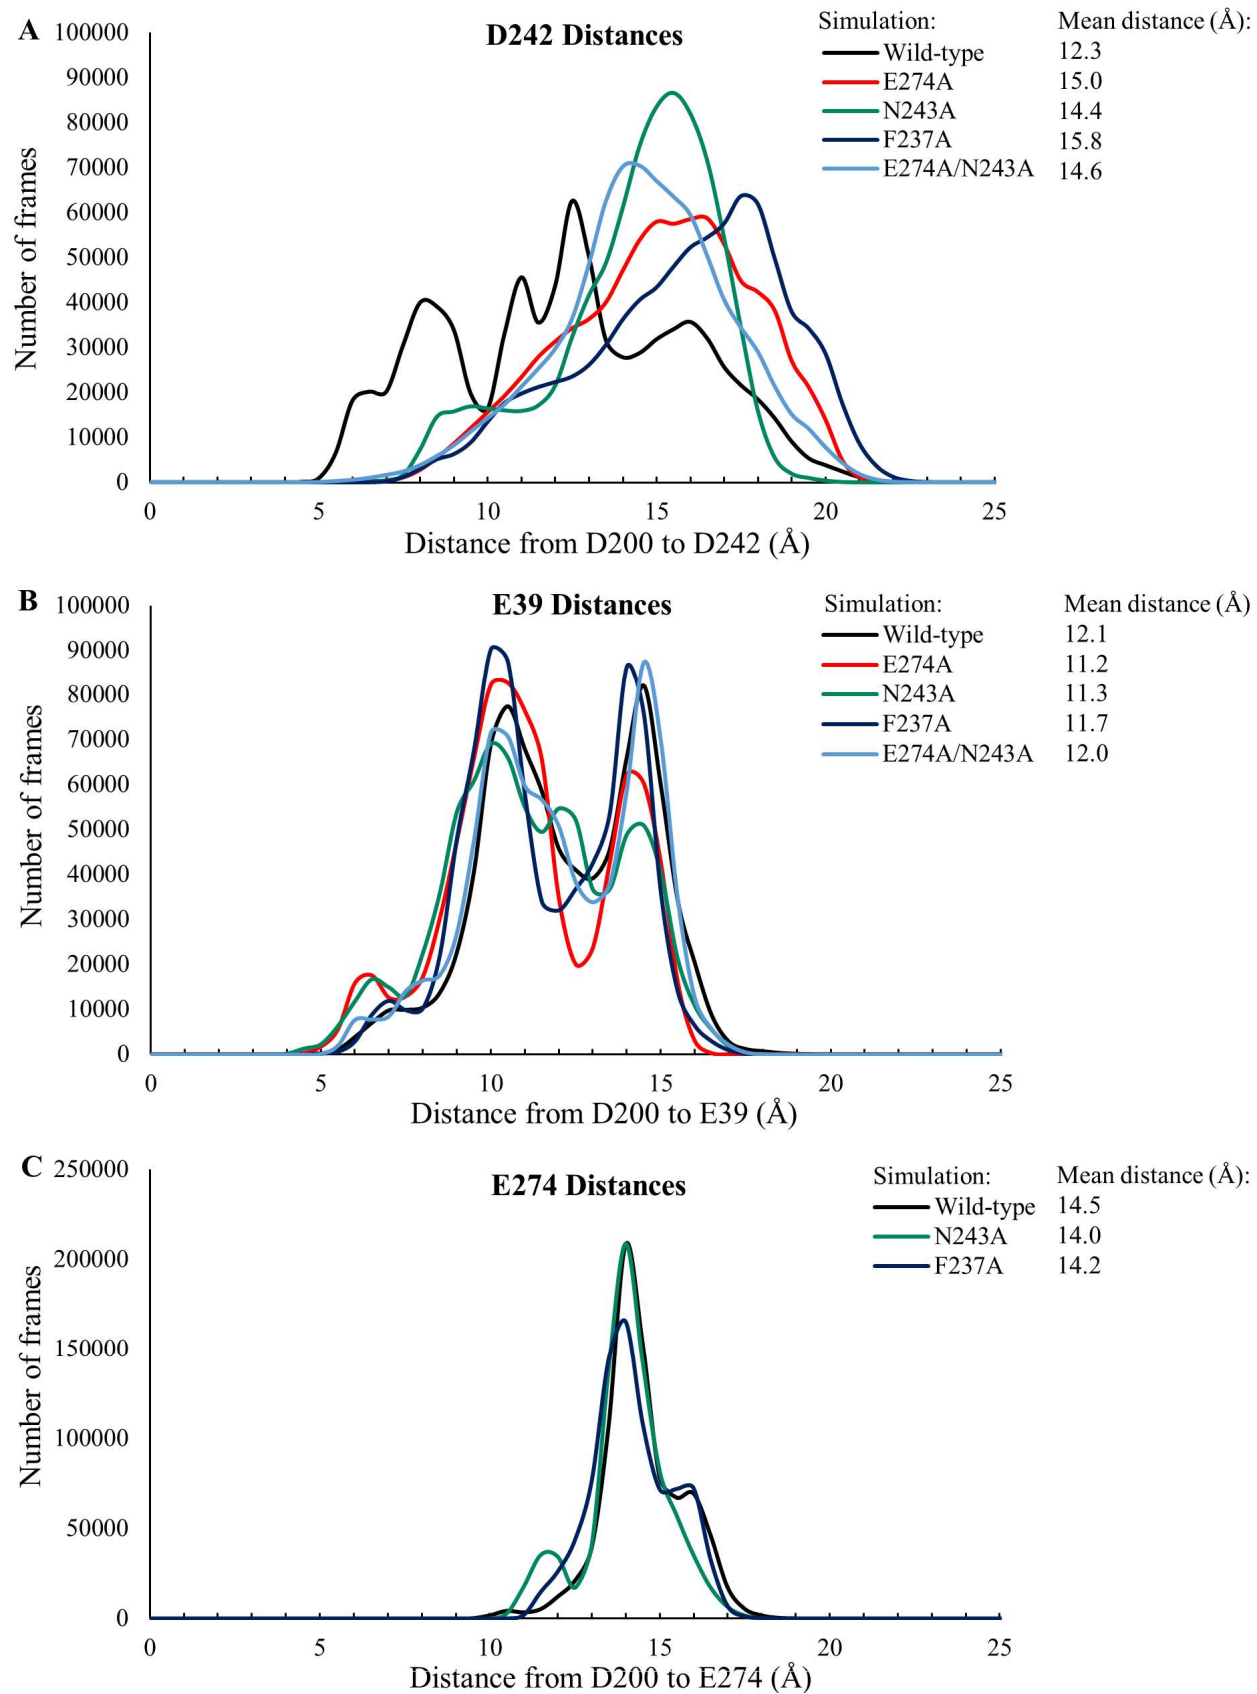

**Supplementary Figure 11.** Molecular dynamic simulation of AlfC transucosylation mutants. Frames are plotted by distance separating  $O_{\delta}$  of D200 and **(A)**  $O_{\delta}$  of D242; **(B)**  $O_{\gamma}$  of E39; **(C)**  $O_{\gamma}$  of E274.

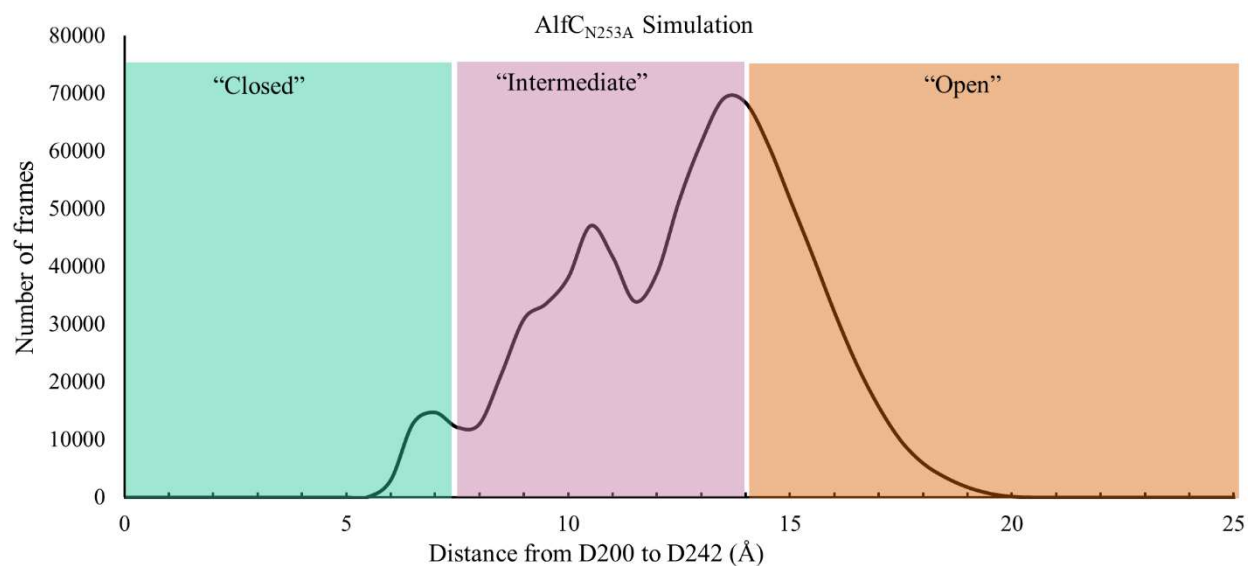

**Supplementary Figure 12.** Molecular dynamic simulation of AlfC<sub>N253A</sub> with frames plotted by distance separating AlfC D200 and D242 O<sub>δ</sub>.

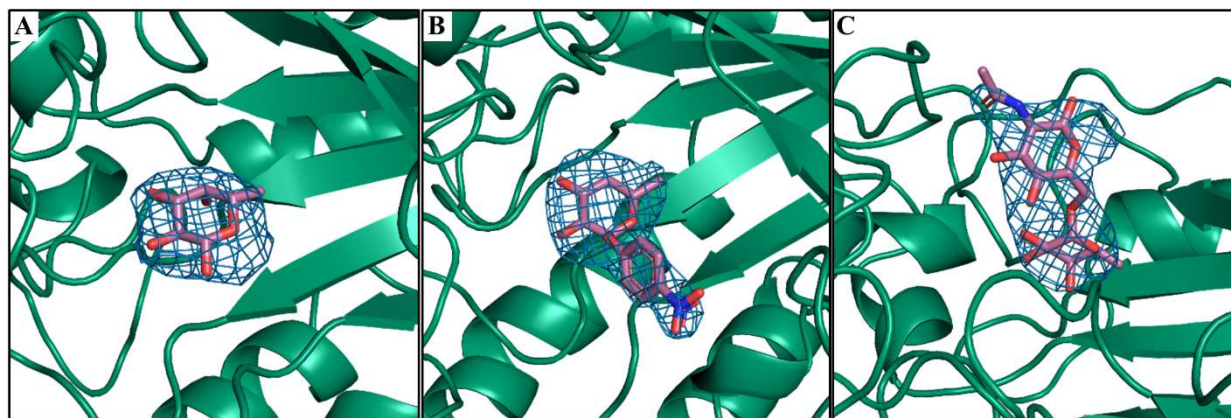

**Supplementary Figure 13.** Polder maps were generated by omitting ligand atoms. **(A)** Fucose,  $\sigma = 5.5$ , carve = 2.3 Å; **(B)** 4NP-fuc,  $\sigma = 4$ , carve = 2.3 Å; **(C)** Fuca(1,6)GlcNAc,  $\sigma = 4$ , carve = 2.6 Å

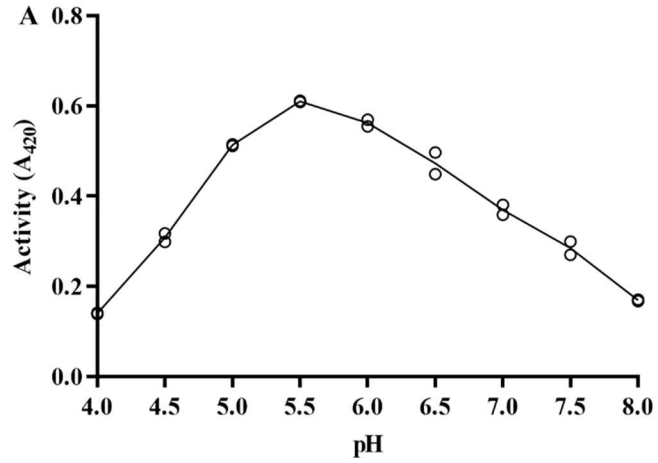

**Supplementary Figure 14.** AlFC pH dependence on 4NP-fuc hydrolysis using 100 mM PCB buffer system (sodium propionate, sodium cacodylate, bis-tris propane). Separate reactions were measured in duplicate.

| Enzyme                                               | Subfamily | Nucleophile | Acid/base candidate 1 | Acid/base candidate 2 | Acid/base candidate 3 | PDB code | Reference |
|------------------------------------------------------|-----------|-------------|-----------------------|-----------------------|-----------------------|----------|-----------|
| Crystal structure available                          |           |             |                       |                       |                       |          |           |
| BT2192                                               | B         | D188        | E234#                 | -                     | E275                  | 3eyp     | N/A       |
| BT3798                                               | B         | D199        | E240#                 | -                     | -                     | 3gza     | N/A       |
| BiAfcB                                               | B         | D172        | E217#                 | E46                   | E281                  | 3ues     | 7         |
| BACOVA_04357                                         | B         | D204        | E249#                 | E78                   | E305                  | 4zrx     | N/A       |
| GH29_0940                                            | B         | D162        | E220#                 | E37                   | E257                  | 5k9h     | 26        |
| FgFCO1                                               | A         | D226        | E288#                 | E46                   | -                     | 4ni3     | 23        |
| $\alpha$ -L-f1wt                                     | A         | D186        | E239#                 | E34                   | E258                  | 6gn6     | 18        |
| Crystal structure and mutagenesis/kinetics available |           |             |                       |                       |                       |          |           |
| Tm $\alpha$ -fuc                                     | A         | D224        | E266#*                | E66                   | E281                  | 1hl8     | 20        |
| BT2970                                               | A         | D229        | E288#*                | E87                   | E306                  | 2wvv     | 8         |
| AlfC                                                 | A         | D200        | D242                  | E39                   | E274                  | 6o18     | This work |
| Mutagenesis/kinetics available                       |           |             |                       |                       |                       |          |           |
| Ss $\alpha$ -fuc                                     | A         | D242        | E292?                 | E58*                  | E292?                 | N/A      | 9         |
| FucA1                                                | A         | D225        | -                     | E70?                  | E289*                 | N/A      | 10        |
| NcFuc                                                | A         | D214        | -                     | E59*                  | E278                  | N/A      | 6         |
| BT4136                                               | B         | D204        | E249*                 | E78?                  | E305                  | N/A      | 5         |
| BT1625                                               | B         | D204        | E249*                 | E78?                  | E305                  | N/A      | 5         |
| cFase I                                              | B         | D242        | E302                  | E68?                  | E315*                 | N/A      | 25        |

**Supplementary Table 1.** GH29  $\alpha$ -fucosidases which have been subjected to acid/base analysis through structure and/or mutagenesis. Acid/base candidate 1 refers to the residue that aligns by sequence or structure with the acid/base of Tm $\alpha$ -fuc; Candidate 2 aligns with the acid/base of Ss $\alpha$ -fuc; Candidate 3 aligns with the acid/base of FucA1. The most likely acid/base residue has been bolded. #, structural evidence; \*, chemical evidence (azide rescue).

| Data Collection                                     | Unliganded AlfC <sub>WT</sub>     | AlfC <sub>WT</sub> -Fucose        | AlfC <sub>D200A</sub> -4NP-Fuc                |
|-----------------------------------------------------|-----------------------------------|-----------------------------------|-----------------------------------------------|
| Resolution range                                    | 29.09 - 2.55 (2.64 - 2.55)        | 29.82 - 2.6 (2.69 - 2.6)          | 39.43 - 2.6 (2.69 - 2.6)                      |
| Space group                                         | C222 <sub>1</sub>                 | C222 <sub>1</sub>                 | P2 <sub>1</sub> 2 <sub>1</sub> 2 <sub>1</sub> |
| Unit cell (a, b, c, $\alpha$ , $\beta$ , $\gamma$ ) | 89.30, 137.12, 264.71, 90, 90, 90 | 89.98, 138.24, 264.44, 90, 90, 90 | 89.73, 139.08, 263.37, 90, 90, 90             |
| Total reflections                                   | 291045 (29172)                    | 245543 (25604)                    | 490615 (47731)                                |
| Unique reflections                                  | 53116 (5271)                      | 50858 (5036)                      | 99099 (9887)                                  |
| Multiplicity                                        | 5.5 (5.5)                         | 4.8 (5.1)                         | 5.0 (4.8)                                     |
| Completeness (%)                                    | 100 (100)                         | 99.0 (100)                        | 96.0 (99.0)                                   |
| Mean I/sigma(I)                                     | 14.53 (1.07)                      | 15.29 (1.12)                      | 8.46 (0.93)                                   |
| Wilson B-factor                                     | 80.60                             | 87.39                             | 65.77                                         |
| R <sub>merge</sub>                                  | 0.059 (1.26)                      | 0.054 (1.29)                      | 0.115 (1.45)                                  |
| R <sub>meas</sub>                                   | 0.066 (1.39)                      | 0.061 (1.43)                      | 0.129 (1.63)                                  |
| CC1/2                                               | 0.999 (0.57)                      | 0.999 (0.495)                     | 0.995 (0.651)                                 |
| CC*                                                 | 1 (0.85)                          | 1 (0.814)                         | 0.999 (0.888)                                 |
| Refinement                                          |                                   |                                   |                                               |
| Reflections used in refinement                      | 53110 (5271)                      | 50853 (5034)                      | 97923 (9831)                                  |
| Reflections used for R-free                         | 2621 (263)                        | 2486 (236)                        | 4987 (514)                                    |
| R <sub>work</sub>                                   | 0.208 (0.406)                     | 0.209 (0.350)                     | 0.2315 (0.398)                                |
| R <sub>free</sub>                                   | 0.242 (0.400)                     | 0.228 (0.388)                     | 0.2607 (0.411)                                |
| CC(work)                                            | 0.951 (0.465)                     | 0.960 (0.596)                     | 0.937 (0.724)                                 |
| CC(free)                                            | 0.964 (0.421)                     | 0.955 (0.476)                     | 0.928 (0.686)                                 |
| Number of non-hydrogen atoms                        | 10225                             | 10255                             | 20999                                         |
| Macromolecules                                      | 10192                             | 10198                             | 20607                                         |
| Ligands                                             | 0                                 | 44                                | 160                                           |
| Real space CC ligands                               | N/A                               | 0.94                              | 0.89                                          |
| Protein residues                                    | 1300                              | 1291                              | 2584                                          |
| Waters                                              | 33                                | 13                                | 232                                           |
| RMS(bonds)                                          | 0.014                             | 0.013                             | 0.014                                         |
| RMS(angles)                                         | 1.73                              | 1.65                              | 1.72                                          |
| Ramachandran favored (%)                            | 93                                | 95                                | 94                                            |
| Ramachandran allowed (%)                            | 6.5                               | 4.9                               | 5.9                                           |
| Ramachandran outliers (%)                           | 0.4                               | 0.55                              | 0                                             |
| Rotamer outliers (%)                                | 3.6                               | 5.6                               | 3.2                                           |
| Average B-factor for macromolecules                 | 101.98                            | 113.43                            | 77.98                                         |
| Average B-factor for ligands                        | N/A                               | 102.09                            | 77.81                                         |
| PDB Code                                            | 6O18                              | 6O1A                              | 6O1C                                          |

**Supplementary Table 2.** Data collection and refinement statistics. Overall values are reported with highest resolution shell in parentheses.



|                                                     |                                  |                                      |                                                  |
|-----------------------------------------------------|----------------------------------|--------------------------------------|--------------------------------------------------|
| Data Collection                                     | AlfC <sub>E274A</sub>            | AlfC <sub>N243A</sub> -Fucose        | AlfC <sub>D200A</sub> -Fuc- $\alpha$ (1,6)GlcNAc |
| Resolution range                                    | 29.12 - 3.55 (3.68 - 3.55)       | 47.75 - 2.0 (2.071 - 2.0)            | 29.04 - 3.14 (3.252 - 3.14)                      |
| Space group                                         | C222 <sub>1</sub>                | P2 <sub>1</sub>                      | C222 <sub>1</sub>                                |
| Unit cell (a, b, c, $\alpha$ , $\beta$ , $\gamma$ ) | 87.75, 139.3, 265.59, 90, 90, 90 | 80.30, 259.92, 80.35, 90, 118.81, 90 | 89.02, 139.25, 263.38, 90, 90, 90                |
| Total reflections                                   | 89921 (9164)                     | 481076 (25229)                       | 143262 (13548)                                   |
| Unique reflections                                  | 18262 (1827)                     | 179997 (11710)                       | 28911 (2824)                                     |
| Multiplicity                                        | 4.9 (5.0)                        | 2.7 (2.0)                            | 5.0 (4.8)                                        |
| Completeness (%)                                    | 91 (93)                          | 91.4 (60.5)                          | 1.00 (1.00)                                      |
| Mean I/sigma(I)                                     | 9.63 (0.81)                      | 9.96 (0.71)                          | 6.59 (0.91)                                      |
| Wilson B-factor                                     | 123.68                           | 39.92                                | 88.81                                            |
| R <sub>merge</sub>                                  | 0.1472 (2.635)                   | 0.065 (0.89)                         | 0.1579 (1.554)                                   |
| R <sub>meas</sub>                                   | 0.1636 (2.921)                   | 0.080 (1.13)                         | 0.1764 (1.746)                                   |
| CC1/2                                               | 0.997 (0.314)                    | 0.997 (0.515)                        | 0.995 (0.439)                                    |
| CC*                                                 | 0.999 (0.691)                    | 0.999 (0.824)                        | 0.999 (0.781)                                    |
| Refinement                                          |                                  |                                      |                                                  |
| Reflections used in refinement                      | 18262 (1822)                     | 176953 (11664)                       | 28911 (2822)                                     |
| Reflections used for R-free                         | 913 (91)                         | 9035 (574)                           | 1445 (153)                                       |
| R <sub>work</sub>                                   | 0.2463 (0.3737)                  | 0.2301 (0.4080)                      | 0.2785 (0.4114)                                  |
| R <sub>free</sub>                                   | 0.2614 (0.3985)                  | 0.2426 (0.4248)                      | 0.2986 (0.3821)                                  |
| CC(work)                                            | 0.953 (0.574)                    | 0.877 (0.575)                        | 0.954 (0.481)                                    |
| CC(free)                                            | 0.938 (0.338)                    | 0.866 (0.437)                        | 0.958 (0.580)                                    |
| Number of non-hydrogen atoms                        | 10197                            | 21640                                | 10367                                            |
| Macromolecules                                      | 10197                            | 20791                                | 10267                                            |
| Ligands                                             | 0                                | 88                                   | 100                                              |
| Real space CC ligands                               | N/A                              | 0.88                                 | 0.89                                             |
| Protein residues                                    | 1296                             | 2590                                 | 1289                                             |
| Waters                                              | 0                                | 761                                  | 0                                                |
| RMS(bonds)                                          | 0.013                            | 0.014                                | 0.007                                            |
| RMS(angles)                                         | 1.59                             | 1.78                                 | 1.26                                             |
| Ramachandran favored (%)                            | 94.1                             | 95.4                                 | 93.5                                             |
| Ramachandran allowed (%)                            | 5.9                              | 4.3                                  | 5.7                                              |
| Ramachandran outliers (%)                           | 0                                | 0.3                                  | 0.8                                              |
| Rotamer outliers (%)                                | 2.4                              | 3.5                                  | 1.4                                              |
| Average B-factor for macromolecules                 | 105.35                           | 53.09                                | 126.62                                           |
| Average B-factor for ligands                        | N/A                              | 55.73                                | 109.53                                           |
| PDB Code                                            | 601I                             | 601J                                 | 60HE                                             |

**Supplementary Table 2.** Data collection and refinement statistics. Overall values are reported with highest resolution shell in parentheses.
